# Supplementary material for: Ephrin receptor A2, the epithelial receptor for Epstein-Barr virus entry, is not available for efficient infection in human gastric organoids
Source: PubMed Central journal article supplement (PMC7935236; doi:10.1371/journal.ppat.1009210), 2021-02-17
Supplement: ppat.1009210.s006.pdf [file ppat.1009210.s006.pdf]

**Supplementary table 1: Organoid medium composition for human gastric organoids.**

ROCK inhibitor was added only after the initial seeding and passaging of the organoids. For basal medium (AD++), Advanced Dulbecco's modified Eagle medium (DMEM)/F12 supplemented with 10 mmol/l HEPES and GlutaMAX 1 X was used. CM: conditioned medium; inh.: inhibitor; N-Ac: N-acetylcysteine; EGF: epidermal growth factor; FGF-10: fibroblast growth factor-10; TGF- $\beta$ : transforming growth factor- $\beta$ ; ROCK: Rho-associated coiled-coil forming protein serine/threonine kinase.

| Reagent                     | Supplier          | Catalog number |                     |
|-----------------------------|-------------------|----------------|---------------------|
| <b>Organoid maintenance</b> |                   |                |                     |
| Matrigel                    | Corning           | 356231         |                     |
| <b>Basal medium (AD++)</b>  |                   |                |                     |
| HEPES                       | Invitrogen        | 15630-056      |                     |
| GlutaMAX-I                  | Invitrogen        | 35050-079      |                     |
| Advanced DMEM/F12 (AD)      | Invitrogen        | 12634-028      |                     |
| <b>Medium components</b>    |                   |                |                     |
| Reagent                     | Supplier          | Catalog number | Final concentration |
| AD++                        |                   |                | 30%                 |
| WNT CM                      | Stable cell line  |                | 50%                 |
| R-Spondin CM                | Stable cell line  |                | 10%                 |
| Noggin CM                   | Stable cell line  |                | 10%                 |
| Primocin                    | Invivogen         | Ant-pm-1       | 100 $\mu$ g/ml      |
| B27                         | Invitrogen        | 12587-010      | 1 X                 |
| N-Ac                        | Sigma-Aldrich     | A9165-5G       | 1.25 mM             |
| EGF                         | Peptotech         | AF-100-15      | 50 ng/ml            |
| FGF-10                      | Peptotech         | 100-26         | 100 ng/ml           |
| Gastrin-I                   | Tocris            | 3006           | 1 nM                |
| TGF- $\beta$ inh. (A-83-01) | Tocris            | 2939           | 2 $\mu$ M           |
| ROCK-inh (Y-27632)          | AbMole Bioscience | M1817          | 10 $\mu$ M          |
